# Supplementary material for: Induced gamma band activity from EEG as a possible index of training-related brain plasticity in motor tasks
Source: PLoS One. 2017 Oct 5;12(10):e0186008. doi: 10.1371/journal.pone.0186008 (PMC5628939; doi:10.1371/journal.pone.0186008)
Supplement: S1 Table — EHI = Edinburgh Handedness Inventory, GBA = Gamma Band Activity, B = Basal, MR = Motor Right, ML = Motor Left, ERS = Event Related Synchronization, INI = Initial, MED = Middle, FIN = Final, ΔGBAB = variation of the basal activity, IP = Index of plasticity, EMG = Electromyogram, PAR = Peak Average Ratio. (XLSX) [file pone.0186008.s001.xlsx]

## Sheet: Hoja1
Article: Induced Gamma Band Activity from EEG as a possible index of training-related brain plasticity in motor tasks.
Carlos Amo, Luis De Santiago, Daniel Zarza Luciáñez, José Miguel León Alonso-Cortés, Miguel Alonso-Alonso, Rafael Barea, Luciano Boquete.
Subject	Laterality EHI	GBA-B	GBA-MR	GBA-ML	ERS-R	ERS-L	GBA-B-ini	GBA-B-med	GBA-B-fin	ΔGBA-B	GBA-MR-ini	GBA-MR-med	GBA-MR-fin	IP-R	GBA-ML-ini	GBA-ML-med	GBA-ML-fin	IP-L	EMG PAR-R	EMG PAR-L
1	10	0.0254	0.0332	0.04	1.30709	1.5748	0.0242	0.027	0.0255	1.05372	0.0226	0.0389	0.0383	1.69469	0.025	0.0402	0.0541	2.164	10.0709	15.8427
2	100	0.0103	0.0136	0.0107	1.32039	1.03883	0.0105	0.0102	0.0103	0.980952	0.0126	0.0146	0.0131	1.03968	0.0108	0.01	0.0114	1.05556	10.0625	14.6559
3	70	0.0069	0.0078	0.0074	1.13043	1.07246	0.0069	0.0068	0.007	1.01449	0.008	0.0078	0.0072	0.9	0.0067	0.007	0.0082	1.22388	10.2445	8.05979
4	90	0.0073	0.0099	0.0086	1.35616	1.17808	0.0073	0.0073	0.0073	1	0.0101	0.0087	0.0113	1.11881	0.0091	0.0079	0.0094	1.03297	10.7009	10.547
5	80	0.0098	0.0099	0.01	1.0102	1.02041	0.0097	0.0099	0.0099	1.02062	0.0098	0.0097	0.0101	1.03061	0.0105	0.0098	0.0095	0.904762	11.5832	12.2533
6	50	0.019	0.0238	0.0237	1.25263	1.24737	0.0189	0.0189	0.019	1.00529	0.0225	0.025	0.0237	1.05333	0.0229	0.027	0.0246	1.07424	11.7424	20.8775
7	50	0.0128	0.014	0.015	1.09375	1.17188	0.01219	0.0127	0.0129	1.05824	0.0131	0.0139	0.0153	1.16794	0.0133	0.0155	0.0166	1.24812	11.3839	13.0079
8	-70	0.012	0.0122	0.0148	1.01667	1.23333	0.012	0.0121	0.012	1	0.0121	0.0118	0.0129	1.06612	0.01	0.0175	0.0218	2.18	15.881	10.9814
9	70	0.0148	0.0182	0.0174	1.22973	1.18367	0.0143	0.0152	0.015	1.04895	0.0173	0.0182	0.0184	1.06358	0.0162	0.018	0.018	1.11111	12.6112	13.6212
10	-100	0.0066	0.0086	0.0105	1.30303	1.59091	0.0065	0.0071	0.0064	0.984615	0.0087	0.0103	0.0084	0.965517	0.0094	0.0112	0.0106	1.12766	12.1238	11.4607
11	80	0.0248	0.0298	0.0303	1.20161	1.22177	0.0251	0.0245	0.0248	0.988048	0.0279	0.0303	0.031	1.11111	0.0278	0.0315	0.0305	1.09712	9.56782	7.70875
12	80	0.025	0.0345	0.0334	1.38	1.34137	0.0247	0.0249	0.0253	1.02429	0.0324	0.035	0.0367	1.13272	0.0291	0.0297	0.04	1.37457	12.3549	13.0818
13	50	0.0209	0.0232	0.0239	1.11005	1.14354	0.021	0.0205	0.0201	0.957143	0.0222	0.0241	0.0237	1.06757	0.026	0.0237	0.0227	0.873077	15.3122	15.5417
14	30	0.0172	0.0195	0.0181	1.13372	1.05848	0.0171	0.0171	0.0174	1.01754	0.0203	0.0198	0.0194	0.955665	0.018	0.0178	0.0184	1.02222	11.5147	10.3816
15	100	0.0133	0.0219	0.0181	1.64662	1.37121	0.0125	0.0136	0.0137	1.096	0.0193	0.0188	0.0289	1.49741	0.0154	0.0188	0.0207	1.34416	12.649	9.98865
16	20	0.0213	0.0258	0.0265	1.21127	1.24413	0.0211	0.0213	0.0215	1.01896	0.0267	0.0253	0.0258	0.966292	0.0255	0.026	0.0274	1.07451	12.4324	9.65612
Mean values	44.375	0.0154625	0.0191187	0.019275	1.23146	1.23077	0.0152494	0.0155687	0.0155062	1.0168	0.01785	0.0195125	0.0202625	1.11444	0.0172313	0.019475	0.0214937	1.24425	11.8897	12.3541
